# Supplementary material for: In Silico Core Proteomics and Molecular Docking Approaches for the Identification of Novel Inhibitors against Streptococcus pyogenes
Source: MDPI journal article supplement (doi:10.3390/ijerph182111355), 2021-10-28
Supplement: s1 [file s1]

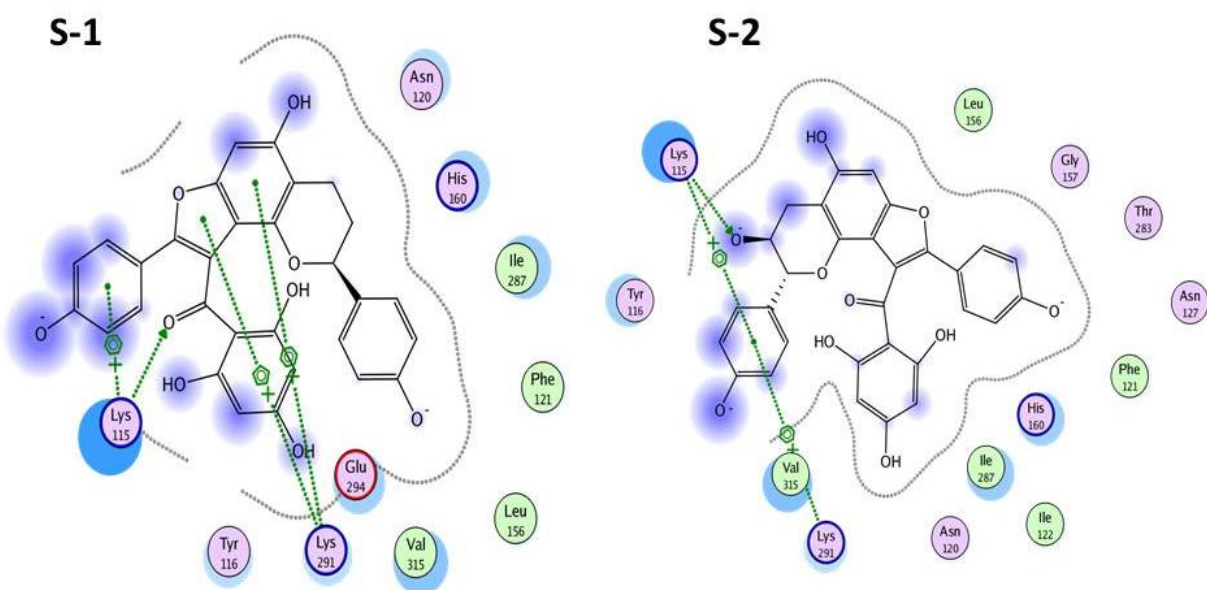

**Figure (S1-S2):** 2D interaction images of **S1)** Flavumone A with DNAA target protein  
**S2)** Daphnodorin A with DNAA target protein

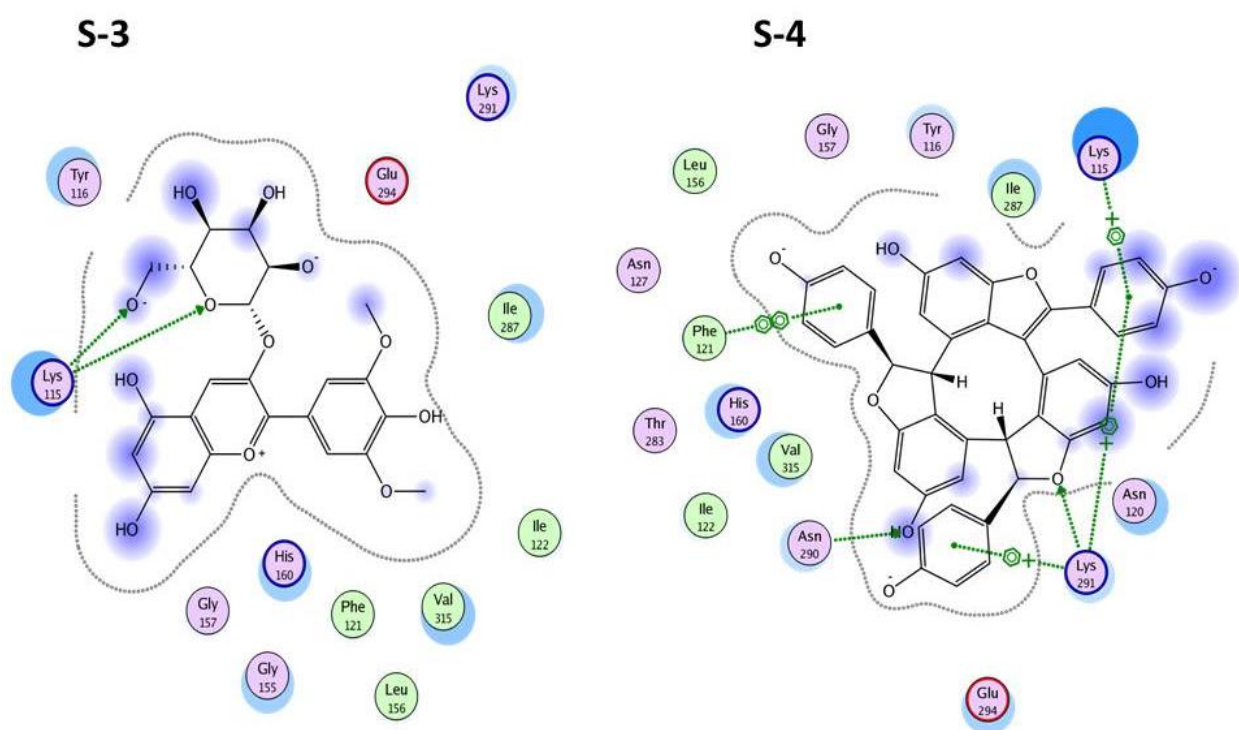

**Figure (S3-S4):** 2D interaction images of **S3)** Oenin with DNAA target protein **S4)** Sophorastilbene A with DNAA target protein

**S-5**

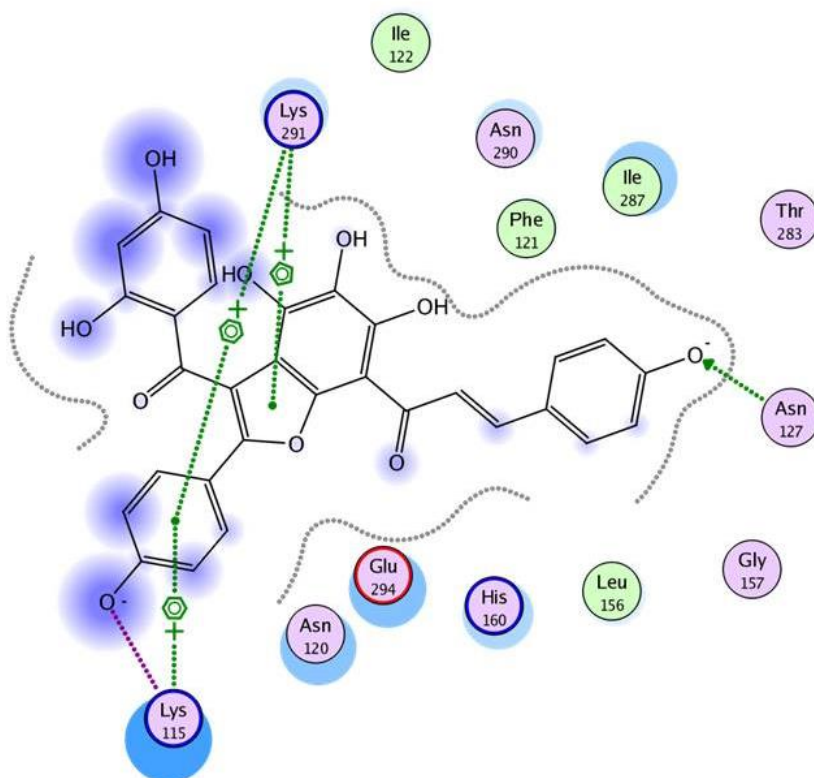

**Figure (S5):** 2D interaction images of **S5)** Daphnodorin B with DNAA target protein.

**S-6**

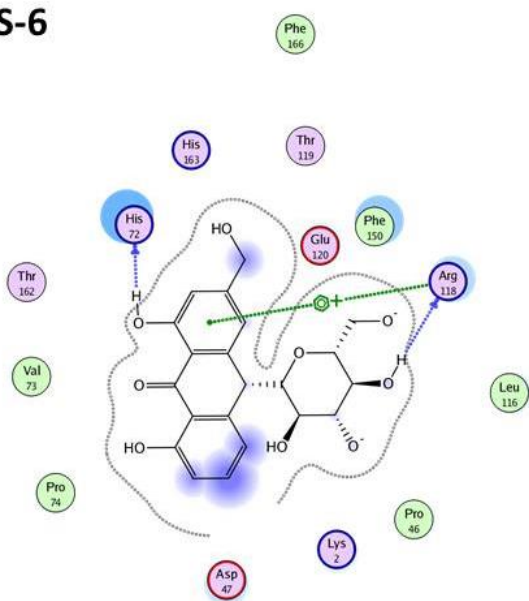

**S-7**

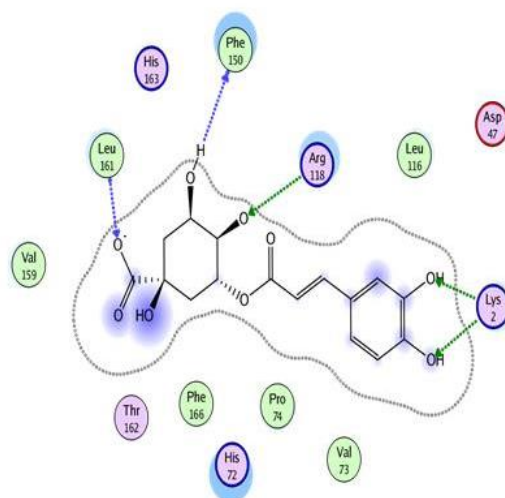

**Figure (S6-S7):** 2D interaction images of **S6)** Aloin B with TCR target protein and **S7)** Chlorogenic acid with TCR target protein

**S-8**

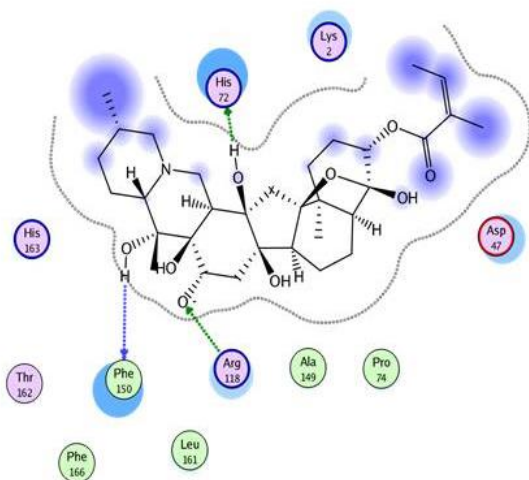

**S-9**

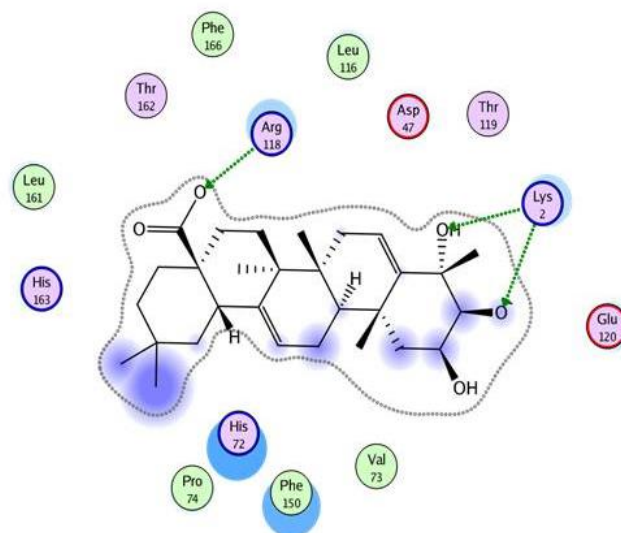

**Figure (S8-S9):** 2D interaction images of **S8)** Triterpenoids with TCR target protein **S9)** Veratrine with TCR target protein)

**S-10**

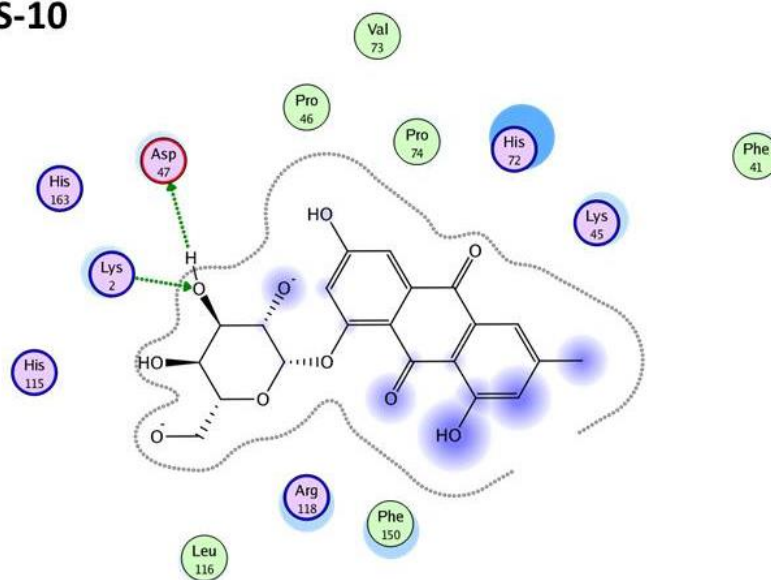

**Figure (S10):** 2D interaction images of **S10)** 1,6-Dihydroxy-3-methyl-8-[(2S,5S)-3,4,5-trihydroxy-6-(hydroxymethyl)oxan-2-yl]oxyanthracene-9,10-dione with TCR target protein
